# Supplementary material
Source: publisher figshare collection journal article supplement (https://sage.figshare.com/ndownloader/files/12376688)
Supplement: Supplementary file 1 [file 12376688]

*There is no right or wrong answer to the statements – we are interested in your sincere responses as only these will ensure the validity of the findings of this investigation. Data will be treated as strictly confidential.*

### Section 1: Terminology

**If you were diagnosed with dementia in the future, how would you most like to be referred to in formal documents like this?**

- ☐ A person with dementia
- ☐ A person with a dementing illness
- ☐ A person living with dementia
- ☐ A dementia sufferer
- ☐ A demented person
- ☐ Other - *please write in:*

### Section 2: Communication

| Please indicate to what extent you agree or disagree with each of the following statement | Strongly agree | Agree | Neither agree nor disagree | Disagree | Strongly disagree |
|-------------------------------------------------------------------------------------------|----------------|-------|----------------------------|----------|-------------------|
| Older people deserve great respect                                                        |                |       |                            |          |                   |

| Please indicate to what extent you agree or disagree with each of the following statements  | Strongly agree | Agree | Neither agree nor disagree | Disagree | Strongly disagree |
|---------------------------------------------------------------------------------------------|----------------|-------|----------------------------|----------|-------------------|
| When communicating with people with dementia:                                               |                |       |                            |          |                   |
| Conversation can be an important part of their treatment                                    |                |       |                            |          |                   |
| Body language (like gesture and posture) are very important                                 |                |       |                            |          |                   |
| Conversation can be a way of reducing anxiety                                               |                |       |                            |          |                   |
| It is acceptable to touch someone gently to get their attention                             |                |       |                            |          |                   |
| It is helpful if medical or care staff wear uniforms so their professional roles are clear  |                |       |                            |          |                   |
| Even very confused speech may hold meaning                                                  |                |       |                            |          |                   |
| It is acceptable to lie to them if you think the truth might be upsetting to hear           |                |       |                            |          |                   |
| You should give them prompts and clues as reminders of who they are or where they are       |                |       |                            |          |                   |
| It is important to check with them that they have understood what has been said             |                |       |                            |          |                   |
| It is preferable to try to talk to a member of their family first, before speaking to them. |                |       |                            |          |                   |

**Section 3: Ethnicity and demographics**

**What is your ethnic group?**

Choose **ONE** group from **A to E**, then complete the appropriate space to indicate your ethnic group

☐ **A White**

*Please write in:* \_\_\_\_\_

☐ **B Mixed**

*Please write in:* \_\_\_\_\_

☐ **C Asian or Asian British**

*Please write in:* \_\_\_\_\_

☐ **D Black or Black British**

*Please write in:* \_\_\_\_\_

☐ **E Chinese or other ethnic group**

*Please write in:* \_\_\_\_\_

**What stage of medicine are you at (e.g. stage 1, stage 2)?:** \_\_\_\_\_

**What is your nationality?:** \_\_\_\_\_

**What is your gender?** ☐ Male ☐ Female

*Many thanks for taking part in this research*
